# Supplementary material
Source: PubMed Central journal article supplement (PMC1383515)
Supplement: 7600932s1.pdf [file 7600932s1.pdf]

## Supplementary information 1:

### Primers for rat cytokines and transcription factors used in the conventional PCR

(sense, anti-sense):

- IL-1 $\beta$*** : 5'-ATG GCA ACT GTC CCT GAA CT,  
5'-GTC ATC ATC CCA CGA GTC AC;
- IL-3***: 5'-TTC CAC CAG GGA CTC CAG ATT,  
5'-ACG GTC ATA GGG CGA AAG TT;
- IL-4***: 5'-CTG CTT TCT CAT ATG TAC CGGG,  
5'-TTT CAG TGT TGT GAG CGT GG;
- IL-5***: 5'-TGA GCA CAG TGG TGA AAG AGA C,  
5'-AAT CCA GGA AAT GCC TGG TC;
- IL-8***: 5'-GAA GAT AGA TTG CAC CGA TG,  
5'-CAT AGA CTC TCA CAC ATT TC;
- IL-10***: 5'-ATT ACC TCT GAT ACC TCAG,  
5'-AGC CTT AGG ATC GAA GT ;
- IL-11***: 5'-ATG AAC TGT GTT TGT CGC CTG,  
5'-CAC CCA CCC CAA TTC TTT AA ;
- IL-13***: 5'-GAC TGC AGT CCT GGC TCT CGC,  
5'-AAC TGA GGT CCA CAG CTG AGA TGT;
- IFN- $\gamma$*** : 5'-AGG ACG GTA ACA CGA AA,  
5'-CTG TGG TTG TTC ACC TC;
- MCP-1***: 5'-AGC CAG ATC TCT CTT CCT CCA,  
5'-CAT TGA AAG TGT TGA ACC AGG;
- TNF- $\alpha$*** : 5'-CAT CTT CTC AAA ACT CGA GTG,  
5'-AGC AAT-GAC TCC AAA GTA GAC;
- c-fos***: 5'-GAT CTG TCC GTC TCT AGT GCC AAC,  
5'-CTC CTC CGA TTC CGG CAC TT;
- fosB***: 5' GGCTGCAAGATCCCCTACGAAGA,  
5' ACGAGGAAGTGTACGAAGGGCT
- fra-1***: 5' CAAGCGCAGACACAGACAGT,  
5' CCACTCGTGCTGCTGGTACC
- fra-2***: 5' AAATTCCGAGTAGATATGCC,  
5' GGGCTGTGAGCAACCAGCAT,
- c-jun***: 5' GCCTCGTTCCTCCAGTCCGA,  
5' TGCGATGGAAAGGCCAGCCC

*junB*: 5' ATGGAACAGCCTTTCTATCAC,  
5' GGGGGGCGTCACGTGGTTCAT  
*β-actin*: 5'-GAT GAG ATT GGC ATG GCT TT,  
5'-CAC CTT CAC CGT TCC AGT TT

**Primers for rat cytokines used in the real time PCR**

(sense, anti-sense):

*IL-1β*: 5'-AGT CAG GCT TCC TTG TGC;  
5'-ATG CTC TCA TCT GGA CAG CC  
*IL-3*: 5'-TCC TGA TGC TCT TCC ACC;  
5'-TCG CAG CTG CAG GAA TAC AAC ACT  
*IL-4*: 5'-GGT CTC AAC CCC CAGCTAGT,  
5'-TGA TGC TCT TTA GGC TTT CCA  
*IL-5*: 5'-TGA GCA CAG TGG TGA AAG AGA C,  
5'-AAT CCA GGA AAT GCC TGG TC;  
*IL-8*: 5'-GAT AGA TTG CAC CGA TGG C,  
5'-AAA CAC GAT CCC AGA CTC  
*IL-10*: 5'-TAG AAG TGA TGC CCC AGG;  
5'-TCA TCC TCC ACC TGC TCC ACT GC  
*IL-11*: 5'-TTG GTA CTT GGA GCG G;  
5'-CAC TGT GAA TAG ACT TCG T  
*IL-13*: 5'-ACA GCT CCC TGG TTC TCT CA;  
5'-CCC CCA TTC ACT ACA CAT CA  
*MCPI*: 5'-TGGCAAGATGATCCCAAT;  
5'-AGGTGGTTGTGGAAAAG  
*TNF-α*: 5'-TTG CCA CTT CAT ACC AGG AGA A,  
5'-TCA CAG AGC AAT GACTCC AA
