# Supplementary material
Source: PubMed Central journal article supplement (PMC1383515)
Supplement: 7600932s3.pdf [file 7600932s3.pdf]

### Supplementary information 3:

#### SPR analysis of the interactions between pITIM-containing peptides derived from the intracellular domain of MAFA and the SH2/PTB domains of SHIP, Shc, Dok-1 and RasGAP.

Synthetic MAFA peptides (LDNSIYSTLEL, LDNSIpYSTLEL; both biotinylated at their N-termini) were immobilized on streptavidin-coated sensor chips (Sensor Chip SA, Biacore AB, Uppsala, Sweden) at 25°C, at a flow rate of 5 µl/min in HEPES-buffered saline (HBS) (10 mM HEPES, 150 mM NaCl, 3.4 mM EDTA, 0.005% surfactant P20, pH 7.4). Ligand binding was monitored following injection (250 µl/sample) of a respective GST-SH2/PTB domain fusion protein (previously dialyzed against HBS) at different concentrations with a flow rate of 20 µl/min in HBS running buffer. Dissociation was monitored during subsequent washing of the chip with HBS running buffer for 3600 s with a flow rate of 20 µl/min. Chip regeneration was performed by injection of 10 µl of HBS running buffer supplemented with 0.01% SDS. SPR measurements employed the BIAcore 2000 apparatus (Pharmacia Biosensor AB, Uppsala, Sweden). All real time curves were best fitted by two-state reaction model and all kinetic and affinity parameters were calculated using the BIAevaluation 3.0.2 software and plotted into the table.

| <b>pY-ITIM+PAAP</b> |                         |                                                                        |                                                           |                                                         |                                                           |
|---------------------|-------------------------|------------------------------------------------------------------------|-----------------------------------------------------------|---------------------------------------------------------|-----------------------------------------------------------|
| Protein             | K <sub>d</sub><br>(nM)  | k <sub>on1</sub> (10 <sup>4</sup> M <sup>-1</sup><br>s <sup>-1</sup> ) | k <sub>off1</sub><br>(10 <sup>-3</sup> .s <sup>-1</sup> ) | k <sub>on2</sub><br>(10 <sup>3</sup> .s <sup>-1</sup> ) | k <sub>off2</sub><br>(10 <sup>-5</sup> .s <sup>-1</sup> ) |
| GST-SHIP<br>.SH2    | <b>1.02</b><br>+/- 0.02 | 7.4<br>+/- 1.1                                                         | 1.9<br>+/- 0.3                                            | 1.4<br>+/- 0.2                                          | 5.2<br>+/- 0.3                                            |
| GST-Dok-1<br>.PTB   | not detectable          |                                                                        |                                                           |                                                         |                                                           |
| GST-RasGAP<br>.SH2  | not detectable          |                                                                        |                                                           |                                                         |                                                           |
| GST-Shc<br>.SH2.PTB | not detectable          |                                                                        |                                                           |                                                         |                                                           |
